# Supplementary material for: Exploring facilitators and barriers to early TB case finding at private community pharmacies in Kampala, Uganda using the Consolidated Framework for Implementation Research (CFIR)
Source: Research Square preprint supplement (doi:10.21203/rs.3.rs-7196158/v1), 2025-08-19
Supplement: Supplementary file 1 [file 9aa0afa928a9cb8efaf90954.docx]

## **In-depth Interview guide with private community pharmacy clients.**

Engaging private community pharmacies in early TB case finding in Kampala.

**Date: | | / | / | |**

**Interviewer Initials:**

**Private pharmacy:**

**Introductory Script:**

*Thank you for taking the time to talk with me today*. *For this research, we are trying to learn more about Engaging private community pharmacies in early TB case finding in Kampala. The WHO and Uganda’s MOH recommends engagement of private providers such private community pharmacies to find the Missing TB cases however, there has been suboptimal implementation of this recommendation. MJAP working with the Uganda Ministry of Health seeks to understand how to engage private community pharmacies in early TB case finding in Kampala.*

*The information from this in depth interview will help us to learn from you how best to develop strategies to integrate TB case finding in private community pharmacies. This interview will take about 20 minutes*

***Before beginning the interview, I will first ask you a few questions about yourself:***

(a) How long have you been a client at this community pharmacy?

(b) What is the reason you are here at the community pharmacy today?

1. Please tell me what you know about TB? (*Have you heard about TB? What have you heard about it or what do you know about it?)*
2. Tell me what you know about the causes of TB
3. How is TB treated/cured? (*What have you heard about its transmission and treatment?)*
4. Have you ever been screened for TB at a community pharmacy?
5. Do you think it is beneficial to you being offered TB screening services in this community pharmacy? (Why or why not?)
6. How would you feel about being offered free TB screening services and referral of presumptive TB cases in your pharmacy?
7. Testing for TB may require provision of a sputum sample, how would you feel about being asked to offer a sputum sample for a test? What would be your concerns? If any.
8. How would you like the Results from the test be communicated to you? Phone call? Sms? Physical pickup?

Thank you very much for your time
