# Supplementary material for: Exploring facilitators and barriers to early TB case finding at private community pharmacies in Kampala, Uganda using the Consolidated Framework for Implementation Research (CFIR)
Source: Research Square preprint supplement (doi:10.21203/rs.3.rs-7196158/v1), 2025-08-19
Supplement: Supplementary file 3 [file dc19594f41a8ad2d9cf97e07.docx]

## **In depth Interview, guide with private community pharmacy healthcare providers.**

**Engaging private community pharmacies in early TB case finding in Kampala.**

**Date: | | / | / | |**

**Interviewer Initials:**

**Private pharmacy:**

**Introductory Script:**

*Thank you for taking the time to talk with me today*. *For this research, we are trying to learn more about Engaging private community pharmacies in early TB case finding in Kampala. The WHO and Uganda’s MOH recommends engagement of private providers such private community pharmacies to find the Missing TB cases however, there has been suboptimal implementation of this recommendation. MJAP working with the Uganda Ministry of Health seeks to understand how to* *engage private community pharmacies in early TB case finding. The information from this in depth interview will help us to learn from you how best to develop strategies to engage private community pharmacies in early TB case finding in Kampala.*

*I would like to use a digital recorder to accurately record your responses during our deliberations. (Consent for digital recording will be obtained prior to the discussions). Thank you for agreeing to be recorded. The recordings will be saved on this digital recorder and after they are transcribed, they will be deleted permanently. Please answer questions as accurately and truthfully as possible. We will not record your names and those of your private pharmacy and all information obtained will be kept as confidential as possible. Participating in this study is optional and if you do not wish to participate at any time during the discussion please let me know. This interview will take about 45 minutes.*

***Before beginning the interview, I will first ask you a few questions about yourself:***

(a) Can you tell me about your profession, current role and responsibilities at this community pharmacy?

(b) How long have you worked at this community pharmacy?

1. Can you tell me what you know about TB? Forms of TB? Signs and symptoms of TB? How it is spread? How do we screen for TB? How is TB treated?
2. From your knowledge and experience, How easy or difficult is it (or would it be) for you to screen for TB in clients at your community pharmacy? *Please consider the following aspects: duration, scope, intricacy and number of steps involved.*
3. What costs will you /or anticipate to incur to screen for TB and refer presumptive TB cases at your community pharmacy? How will TB screening and referral of presumptive TB cases affect revenue for your community pharmacy?
4. How will the infrastructure of your pharmacy facilitate/hinder implementation of the TB screening?
5. What kinds of changes at your pharmacy will be needed to accommodate TB screening? *(Changes in scope of practice? Changes in formal policies? Changes in information systems or electronic records systems? Other? What kind of approvals will be needed? Who will need to be involved? , Can you describe the process that will be needed to make these changes? )*
6. How will you work around these challenges?
7. What would be the general level of receptivity in your community pharmacy to implementing TB screening? Why?
8. What kinds of incentives would help you ensure that the implementation of TB screening is successful? *(What is your motivation for wanting to help ensure the implementation is successful?)*
9. To what extent do you think your supervisor will consider your role in TB screening in your (next) evaluation? In his/her regard for your work or role?
10. Would you like any special recognitions or rewards that are related to implementing TB screening? *(Can you describe them? Do you need these to be targeted to groups/teams/units or individuals? )*
11. Do you feel the leadership at your pharmacy will endorse or support TB screening at this pharmacy? *Who are these leaders and how can this affect things going forward?*
12. What kind of support or actions would you expect from leaders in your pharmacy to help make TB screening in this pharmacy successful? Can you provide specific examples?
13. Do you expect to have sufficient resources to implement TB screening and referral of presumptive TB cases at your pharmacy? [If Yes] What resources are you counting on? Are there any other resources you would have like to receive? What resources will be easy to procure? [If no] What resources will not be available?
14. Do you feel you or your colleagues require any training to perform TB screening for your clients? Do you feel the training will prepare you to carry out the roles and responsibilities expected of you? Can you explain? How do you suggest the training be conducted? And how often?
15. What kinds of information and materials about the TB screening should be made available to you and how? *Copies of materials? , Personal contact? , Internal information sharing; e.g., staff meetings? How often? Scope? Quantities?*
16. Whom would you prefer to ask if you have questions about TB screening or its implementation? How available do you want these individuals to be?
17. Do you think carrying out TB screening and referral of presumptive TB cases will be effective in your pharmacy? (Why or why not?)
18. How do you feel about o TB screening services and referral of presumptive TB cases in your pharmacy? How do you feel about the plan to implement the intervention in your setting? *Do you have any feelings of anticipation? Stress? Enthusiasm? Why?*
19. Have you suspected a client to have TB in the last 6 months at your community pharmacy*? How did you screen for TB? What happened when you suspected the client to have TB?*
20. How confident are you that you will be able to successfully carry out TB screening and referral of presumptive TB cases? What gives you that level of confidence (or lack of confidence)?
21. How confident do you think your colleagues feel about carrying out TB screening and referral of presumptive TB cases? What gives them that level of confidence (or lack of confidence)?
22. Would you be willing to be a recognized as a champion (go above and beyond what might be expected) for screening your clients for TB? How do you think you would help with implementation? Getting your clients to be screened for TB?
23. What do you think will be your peer’s perception of this champion/individual? To what extent do you respect the opinions and actions of the champion?
24. How will you or your colleagues communicate to the pharmacy clients about availability of TB screening at your pharmacy? How will they participate in the TB screening? How will they access the TB screening?
25. What kind of information would you want to collect as you implement TB screening and referral of presumptive TB cases? Which measures would you want to track? How will you track them? How will this information be used?
26. Would you like to receive feedback reports about the implementation or the intervention itself from the project team? How would you like them? Content, mode, form? How helpful do you think they will be? How often would you want to get them?

Thank you very much for your time.
