# Supplementary material for: Exploring facilitators and barriers to early TB case finding at private community pharmacies in Kampala, Uganda using the Consolidated Framework for Implementation Research (CFIR)
Source: Research Square preprint supplement (doi:10.21203/rs.3.rs-7196158/v1), 2025-08-19
Supplement: Supplementary file 4 [file e858d68bcb57d9307b21c649.docx]

**Key informant Interview guide with private community pharmacy owners and/or managers.**

Engaging private community pharmacies in early TB case finding in Kampala.

**Date: | | / | / | |**

**Interviewer Initials:**

**Private pharmacy:**

**Introductory Script:**

*Thank you for taking the time to talk with me today*. *For this research, we are trying to learn more about Engaging private community pharmacies in early TB case finding in Kampala. The WHO and Uganda’s MOH recommends engagement of private providers such private community pharmacies to find the Missing TB cases however, there has been suboptimal implementation of this recommendation. MJAP working with the Uganda Ministry of Health seeks to understand how to engage private community pharmacies in early TB case finding in Kampala.*

*The information from this key informant interview will help us to learn from you how best to develop strategies to integrate TB case finding in private community pharmacies. This interview will take about 20 minutes*

***Before beginning the interview, I will first ask you a few questions about yourself:***

(a) What is your job title?

(b) Can you please give me an overview of your roles at this organization (NLTP and PSU)/ Pharmacy (pharmacy owner)?

1. What is your comment about starting TB screening services at private community pharmacies in Kampala?
2. Do you think it is beneficial to offered TB screening services at private community pharmacies in Kampala? (Why or why not?)
3. What would be your concerns if any about TB screening services at private community pharmacies in Kampala?
4. What would be your recommendation on how screening for TB can be achieved at private community pharmacies in Kampala?

Thank you very much for your time
